# Supplementary material for: Highly sensitive and selective detection of biothiols by a new low dose colorimetric and fluorescent probe
Source: Royal Society of Chemistry journal article supplement (doi:10.1039/c5ra11841g), 2015-01-01
Supplement: c5ra11841g1.pdf [file c5ra11841g1.pdf]

## **Electronic Supplementary Information (ESI)**

for

### **Highly sensitive and selective detection of biothiols by a new low dose colorimetric and fluorescent probe**

Qiong Zhang, Shuangshuang Ding, Qisong Zhai and Guoqiang Feng\*

*Key Laboratory of Pesticide and Chemical Biology of Ministry of Education, College of Chemistry, Central China*

*Normal University, 152 Luoyu Road, Wuhan 430079, P. R. China.*

\*Corresponding author. Tel.: +86 27 67867958; fax: +86 27 67867955

E-mail: [gf256@mail.ccnu.edu.cn](mailto:gf256@mail.ccnu.edu.cn) (G. Feng).

#### **Contents**

- 1. The optical spectra of probe 1 and compound 2.....page 2**
- 2. Data for investigation of the sensing mechanism.....page 2**
- 3. A colorimetric assay of probe 1 for biothiols.....page 3**
- 4. Interference experiments of probe 1 for detection of biothiols.....page 4**
- 5. Kinetics of probe 1 with Cys, Hcy and GSH.....page 4**
- 6. Additional data.....page 5-7**
- 7. Structure characterizations of probe 1.....page 8-9**

## 1. The optical spectra of probe 1 and compound 2

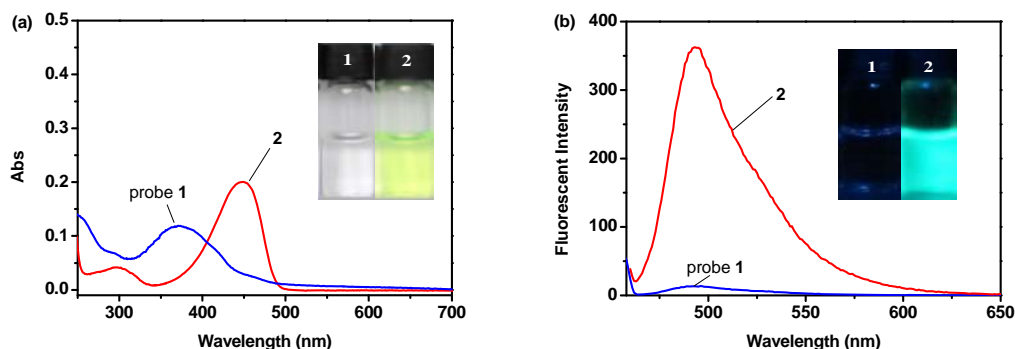

**Fig. S1** (a) The UV-Vis spectra of probe **1** (5  $\mu\text{M}$ ) and compound **2** (5  $\mu\text{M}$ ) in PBS buffer (10 mM, pH 7.4, with 20% DMSO, v:v) at 37°C. (b) The fluorescence spectra of probe **1** (1  $\mu\text{M}$ ) and compound **2** (1  $\mu\text{M}$ ) in PBS buffer (10 mM, pH 7.4, with 20% DMSO, v:v) at 37°C.  $\lambda_{\text{ex}} = 453 \text{ nm}$ , slit width:  $d_{\text{ex}} 2.5 \text{ nm}/d_{\text{em}} 5 \text{ nm}$ . Color and emission color under a 365 nm light of **1** and **2** are inserted, respectively. The fluorescence quantum yield ( $\Phi$ ) for **1** and **2** under this experimental condition was determined to be 0.07 and 0.65, respectively, using rhodamine B as standard.

## 2. Data for investigation of the sensing mechanism

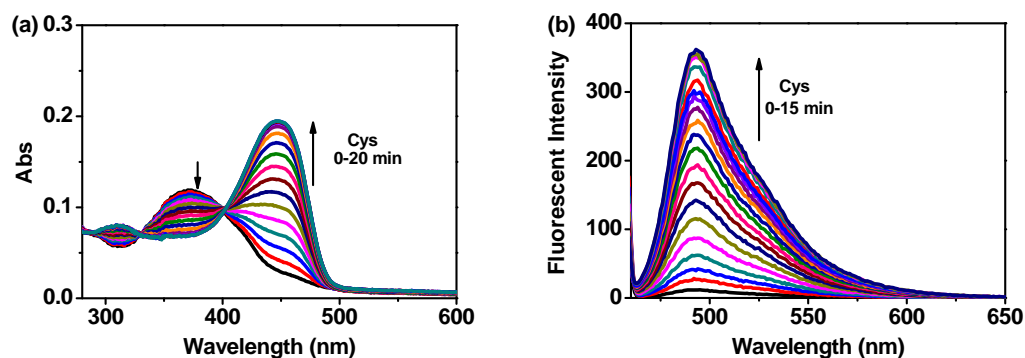

**Fig. S2** (a) UV-vis absorption spectra changes of probe **1** (5  $\mu\text{M}$ ) against time (0-20 min) upon addition of 5 equiv of Cys. (b) Fluorescence spectra changes of probe **1** (1  $\mu\text{M}$ ) against time (0-15 min) upon addition of 5 equiv of Cys. Data were collected in PBS buffer (10 mM, pH 7.4, 20% DMSO, v/v) at 37°C. For fluorescence measurement,  $\lambda_{\text{ex}} = 453 \text{ nm}$ , slit:  $d_{\text{ex}} 2.5 \text{ nm}/d_{\text{em}} 5 \text{ nm}$ . These data showed the conversion process of probe **1** to compound **2** in the presence of Cys.



#### 4. Interference experiments of probe 1 for detection of biothiols

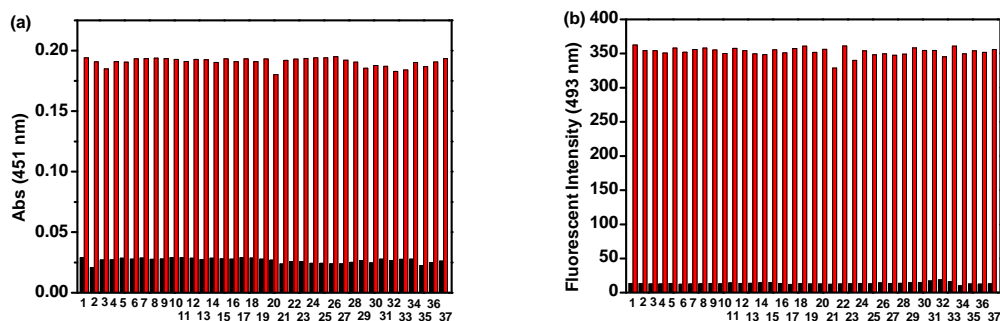

**Fig. S5** (a) Absorbance responses of probe 1 (5  $\mu$ M) at 451 nm and (b) fluorescence responses of probe 1 (1  $\mu$ M) at 493 nm to GSH (50  $\mu$ M) in the presence of 100  $\mu$ M of various analytes (1. blank, 2.  $F^-$ , 3.  $Cl^-$ , 4.  $Br^-$ , 5.  $I^-$ , 6.  $ACO^-$ , 7.  $C_2O_4^{2-}$ , 8.  $NO_3^-$ , 9.  $NO_2^-$ , 10.  $PO_4^{3-}$ , 11.  $HPO_4^{2-}$ , 12.  $H_2PO_4^-$ , 13.  $S^{2-}$ , 14.  $HS^-$ , 15.  $S_2O_4^{2-}$ , 16.  $S_2O_7^{2-}$ , 17.  $IO_4^-$ , 18.  $ClO_4^-$ , 19.  $SCN^-$ , 20. Ala, 21. Glu, 22. Thr, 23. Trp, 24. Phe, 25. Gln, 26. Gly, 27. Lys, 28. Arg, 29. Ile, 30. Asp, 31. Leu, 32. Ser, 33. Met, 34. His, 35.  $H_2NCH_2CH_2NH_2$ , 36.  $HOCH_2CH_2NH_2$ , 37.  $C_6H_5CH_2NH_2$ ). Black bars represent the blank and the addition of a single analyte (2-37). Red bars represent the subsequent addition of GSH (50  $\mu$ M) to the mixture. Each spectrum was collected after 15 min of addition of analyte in PBS buffer (10 mM, pH 7.4, 20% DMSO) at 37°C. For fluorescence measurement,  $\lambda_{ex}$  = 453 nm, slit: 2.5 nm/5 nm.

#### 5. Kinetics of probe 1 with Cys, Hcy and GSH

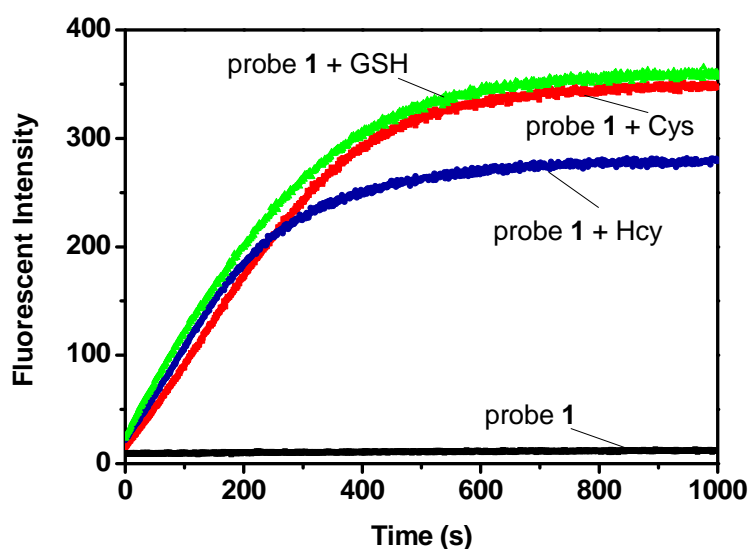

**Fig. S6** Fluorescent kinetics of probe 1 (1  $\mu$ M) in the absence and presence of 5  $\mu$ M Cys, Hcy and GSH in DMSO-PBS buffer (10 mM, pH 7.4, 20% DMSO) at 37°C. The reactions are monitored at 493 nm with  $\lambda_{ex}$  = 453 nm, slit: 2.5 nm/5 nm.

## 6. Additional data

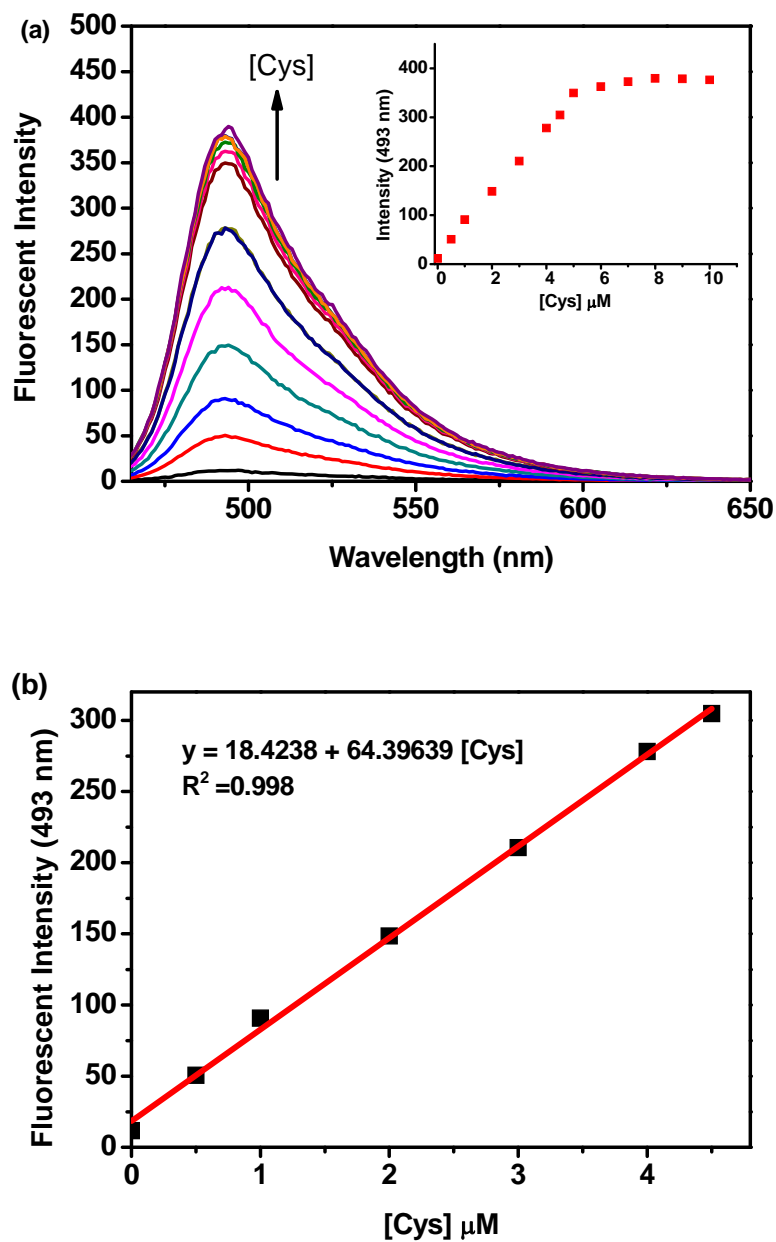

**Fig. S7** (a) Fluorescence spectra changes of probe 1 (1  $\mu\text{M}$ ) in DMSO-PBS buffer (10 mM, pH 7.4, 20% DMSO) at 37°C upon addition of different concentrations of Cys (0–10  $\mu\text{M}$ ). Each spectrum was obtained 15 min after Cys addition. Insert: Fluorescence intensity changes at 493 nm as a function of [Cys].  $\lambda_{\text{ex}} = 453 \text{ nm}$ , slit: 2.5 nm/5 nm. (b): Linear relationship of fluorescence intensity at 493 nm as a function of Cys concentration (0–4.5  $\mu\text{M}$ ).

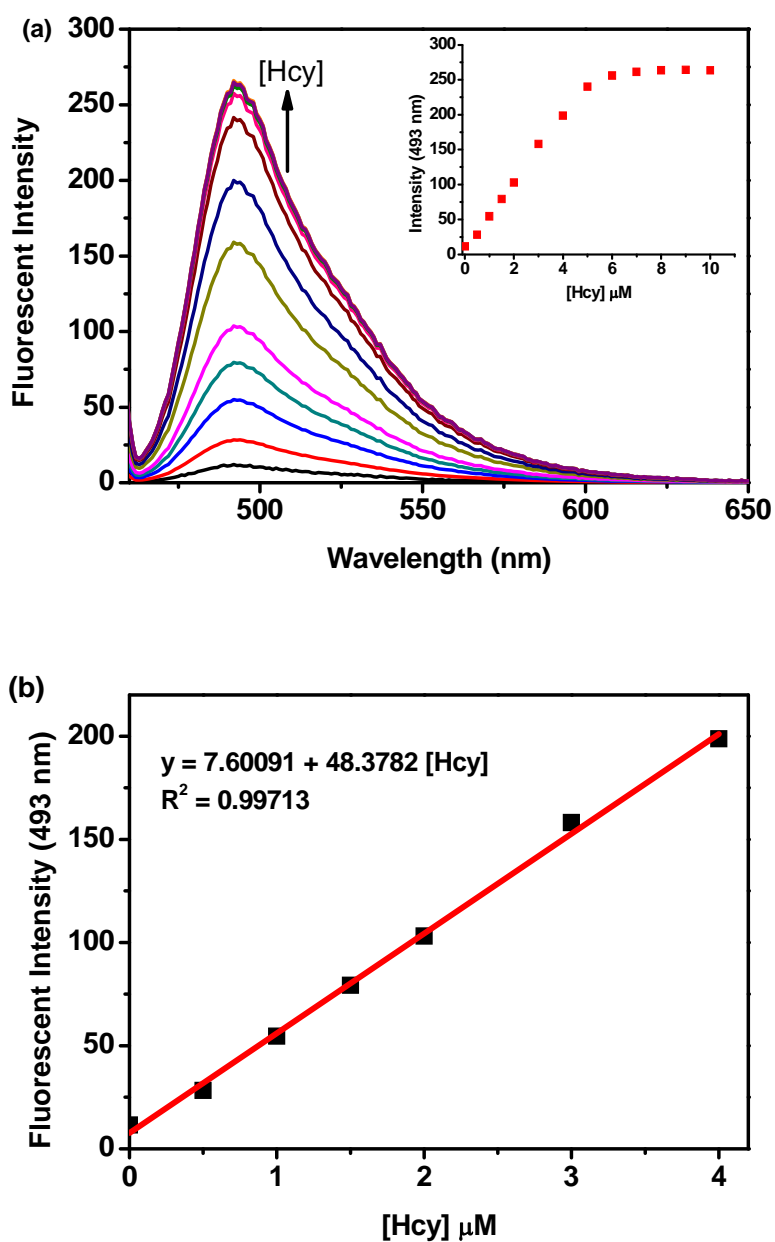

**Fig. S8** (a) Fluorescence spectra changes of probe 1 (1  $\mu\text{M}$ ) in DMSO-PBS buffer (10 mM, pH 7.4, 20% DMSO) at 37°C upon addition of different concentrations of Hcy (0–10  $\mu\text{M}$ ). Each spectrum was obtained 15 min after Hcy addition. Insert: Fluorescence intensity changes at 493 nm as a function of [Hcy].  $\lambda_{\text{ex}} = 453$  nm, slit: 2.5 nm/5 nm. (b): Linear relationship of fluorescence intensity at 493 nm as a function of Hcy concentration (0–4  $\mu\text{M}$ ).

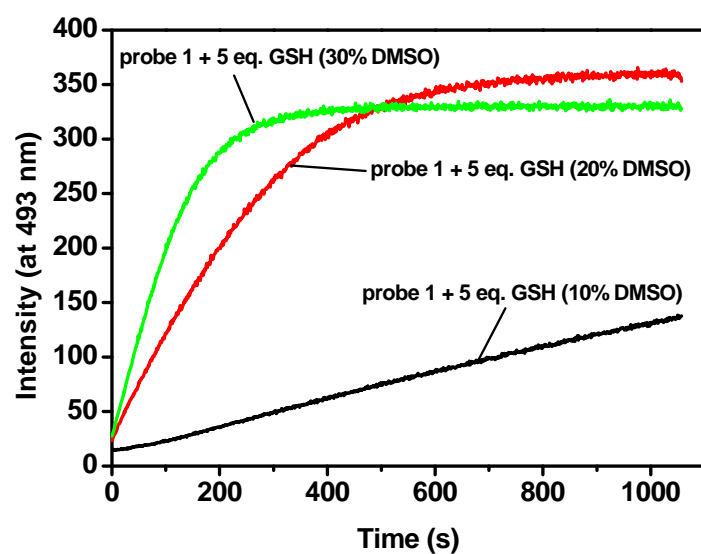

**Fig. S9** The fluorescence kinetics of probe **1** (1  $\mu\text{M}$ ) upon addition 5 equiv of GSH in PBS buffer (10 mM, pH 7.4, with 10-30% DMSO, v:v) at 37°C.  $\lambda_{\text{ex}} = 453 \text{ nm}$ , slit width:  $d_{\text{ex}} 2.5 \text{ nm}/d_{\text{em}} 5 \text{ nm}$ .

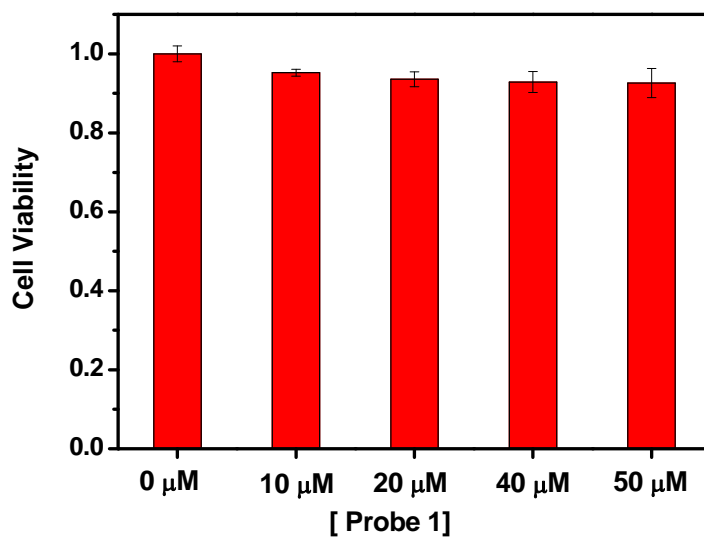

**Fig. S10** Percentage of viable HeLa cells after treatment with indicated concentrations of probe **1** after 12 hours. The cell viability was observed via MTT assay.

## 7. Structure characterizations of probe 1

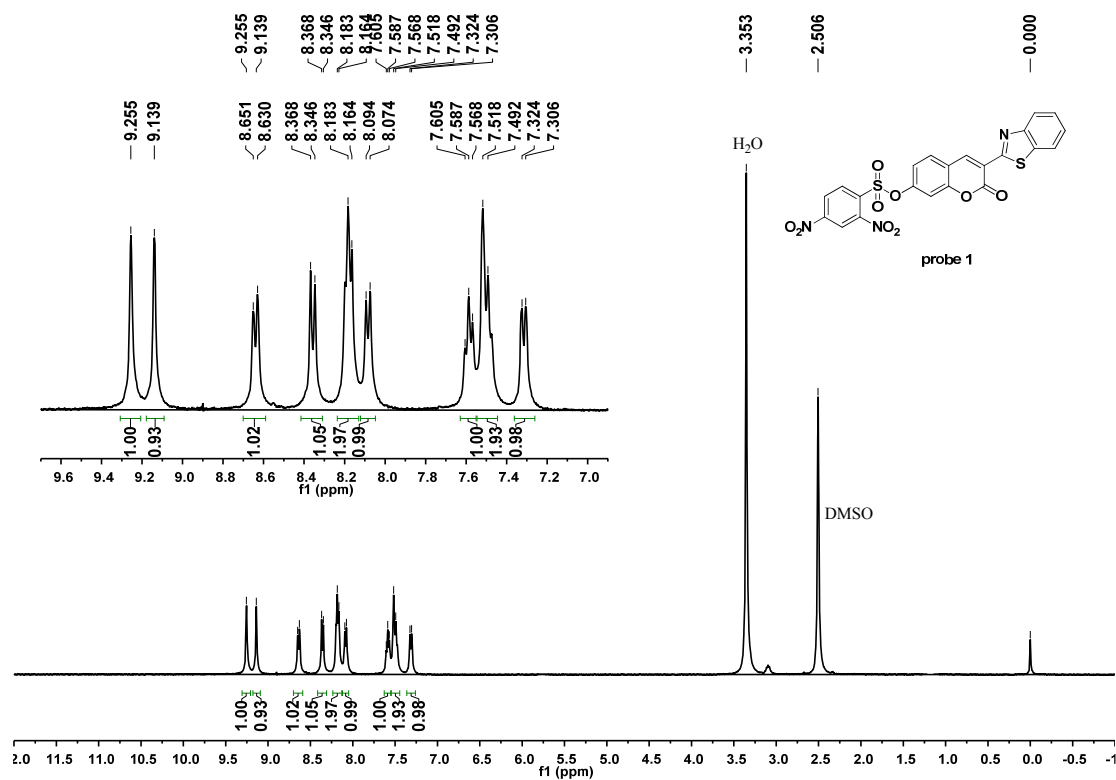

<sup>1</sup>H-NMR spectrum of probe 1 in *d*<sub>6</sub>-DMSO

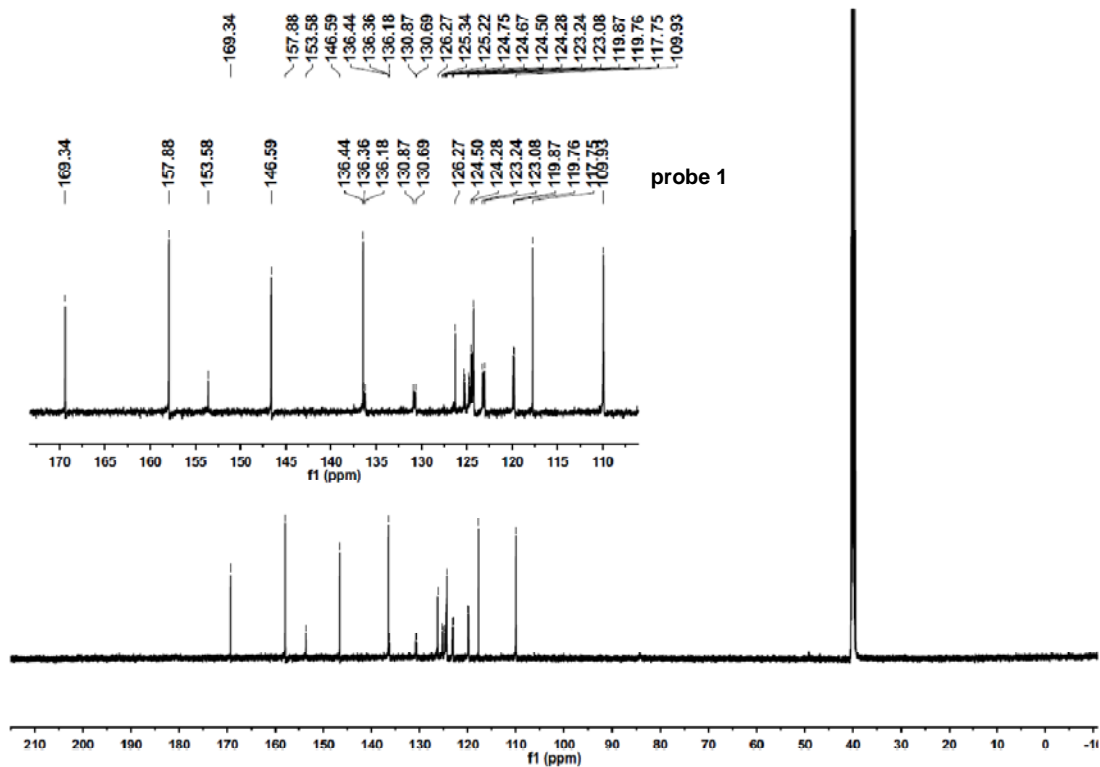

<sup>13</sup>C-NMR spectrum of probe 1 in *d*<sub>6</sub>-DMSO



ZQ-38 #481 RT: 3.58 AV: 1 SB: 538 0.04-3.35, 3.62-4.26 NL: 2.13E4  
T: + c Fullms [40.00-800.00]

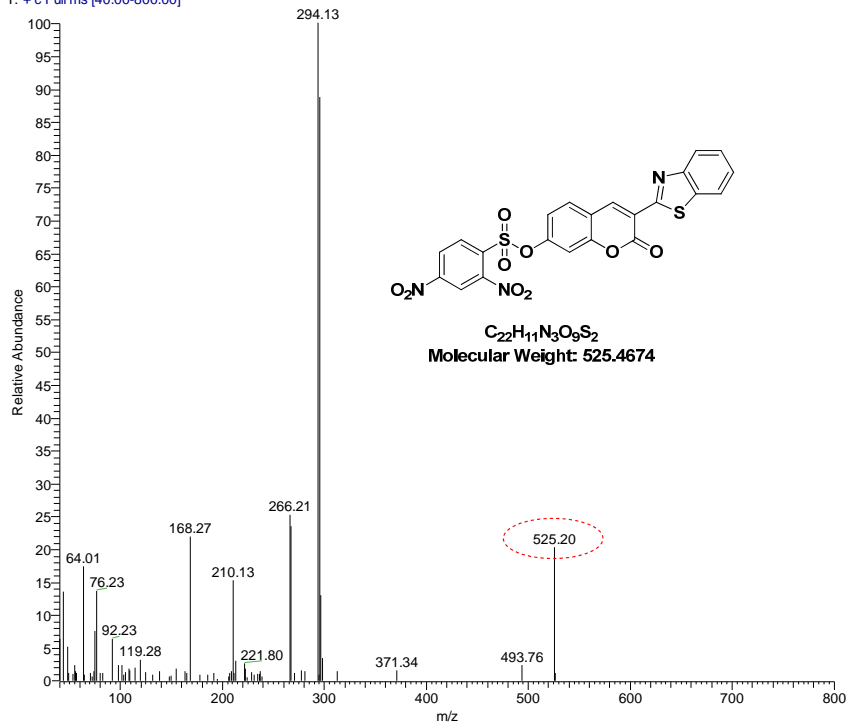

MS (EI) spectrum of probe 1

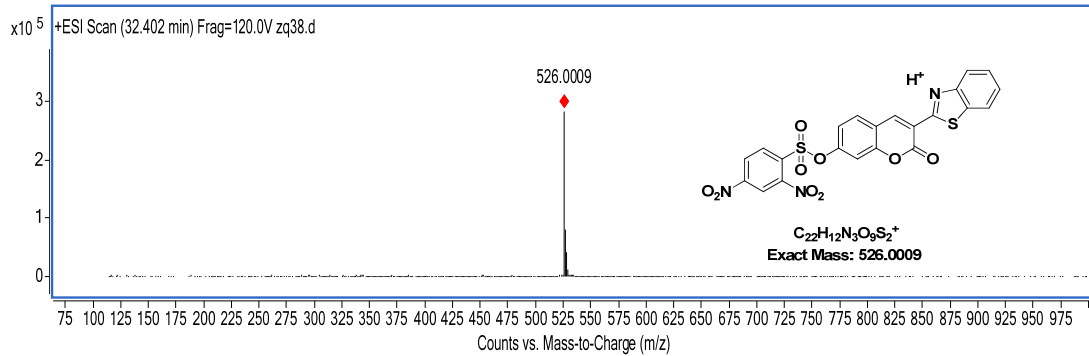

HR-MS spectrum of probe 1
